# Supplementary material for: Self-Instruction Video Versus Face-to-Face Instruction of Pharmacy Students’ Skills in Blood Pressure Measurement
Source: MDPI journal article supplement (doi:10.3390/pharmacy8040217), 2020-11-16
Supplement: s1 [file s1]

Supplemental Material 1: Summarized content of the OSCE checklist of the blood pressure measurement

| Section                                           | Number of Items in the Respective Section | Summarized Content                                                                                                                                                                                                                                                                                                                                                                                                                                                                 |
|---------------------------------------------------|-------------------------------------------|------------------------------------------------------------------------------------------------------------------------------------------------------------------------------------------------------------------------------------------------------------------------------------------------------------------------------------------------------------------------------------------------------------------------------------------------------------------------------------|
| General Preparation of Blood Pressure Measurement | 9                                         | <ul style="list-style-type: none"> <li>• Examinee asks questions about factors that potentially could affect BP (6 items)</li> <li>• Examinee inquires whether measuring arm is known (1 item)</li> <li>• Examinee asks the patient to remove clothing from arm (or arms respectively, if both arms are intended to be measured) without rolling up sleeves (1 item)</li> <li>• Examinee measures arm circumference/s (1 item)</li> </ul>                                          |
| Resting Phase                                     | 4                                         | <ul style="list-style-type: none"> <li>• Examinee gives instructions to the patient regarding the patient's position during the rest period (2 items)</li> <li>• Examinee gives instructions to the patient regarding the patient's attitude during the rest period (1 item)</li> <li>• Examinee lets the patient relax (rest) for 5 minutes in a seated position (before measurement) (1 item)</li> </ul>                                                                         |
| Steps of the Blood Pressure Measurement           | 18                                        | <ul style="list-style-type: none"> <li>• Examinee selects correct cuff size (1 item)</li> <li>• Examinee places the cuff correctly (5 items)</li> <li>• Examinee gives instructions to the patient regarding the patient's body position, arm position, and attitude during BP measurement (5 items)</li> <li>• Examinee measures BP correctly (5 items)</li> <li>• Examinee reports the measured BP appropriately to the patient and asks for open questions (2 items)</li> </ul> |
| Documentation                                     | 6                                         | <ul style="list-style-type: none"> <li>• Examinee documents properly (6 items)</li> </ul>                                                                                                                                                                                                                                                                                                                                                                                          |

BP= blood pressure
