# Supplementary material for: Self-Instruction Video Versus Face-to-Face Instruction of Pharmacy Students’ Skills in Blood Pressure Measurement
Source: MDPI journal article supplement (doi:10.3390/pharmacy8040217), 2020-11-16
Supplement: s1 [file s1]

## **Self-assessment survey**

Coding of participant: \_\_\_\_\_

Date: \_\_\_\_\_

How do you rate your competence in the following areas?

Please tick the boxes.

---

|                                                                                                                                                     |                                               |                                      |                                             |                                          |                                   |                                            |
|-----------------------------------------------------------------------------------------------------------------------------------------------------|-----------------------------------------------|--------------------------------------|---------------------------------------------|------------------------------------------|-----------------------------------|--------------------------------------------|
| <i>1. I feel able to correctly measure blood pressure in the community pharmacy.</i>                                                                | <input type="checkbox"/><br>Strongly disagree | <input type="checkbox"/><br>Disagree | <input type="checkbox"/><br>Rather disagree | <input type="checkbox"/><br>Rather agree | <input type="checkbox"/><br>Agree | <input type="checkbox"/><br>Strongly agree |
| <i>2. I feel confident in the use of oscillometric upper-arm blood pressure monitors.</i>                                                           | <input type="checkbox"/><br>Strongly disagree | <input type="checkbox"/><br>Disagree | <input type="checkbox"/><br>Rather disagree | <input type="checkbox"/><br>Rather agree | <input type="checkbox"/><br>Agree | <input type="checkbox"/><br>Strongly agree |
| <i>3. I feel confident in choosing the proper blood pressure monitor.</i>                                                                           | <input type="checkbox"/><br>Strongly disagree | <input type="checkbox"/><br>Disagree | <input type="checkbox"/><br>Rather disagree | <input type="checkbox"/><br>Rather agree | <input type="checkbox"/><br>Agree | <input type="checkbox"/><br>Strongly agree |
| <i>4. I know the necessary steps for an accurate blood pressure measurement with an oscillometric upper-arm blood pressure monitor.</i>             | <input type="checkbox"/><br>Strongly disagree | <input type="checkbox"/><br>Disagree | <input type="checkbox"/><br>Rather disagree | <input type="checkbox"/><br>Rather agree | <input type="checkbox"/><br>Agree | <input type="checkbox"/><br>Strongly agree |
| <i>5. If hypothetically, I am given the task of measuring blood pressure again in a month, I will be able to measure blood pressure accurately.</i> | <input type="checkbox"/><br>Strongly disagree | <input type="checkbox"/><br>Disagree | <input type="checkbox"/><br>Rather disagree | <input type="checkbox"/><br>Rather agree | <input type="checkbox"/><br>Agree | <input type="checkbox"/><br>Strongly agree |
